# Supplementary material
Source: PubMed Central journal article supplement (PMC4302212)

**Inherited mutations in 17 breast cancer susceptibility genes among a large triple-negative breast cancer cohort unselected for family history of breast cancer**

Couch, et al

## SUPPLEMENTARY MATERIALS

### SUPPLEMENTARY METHODS

#### ***Phenotypic information***

DNA samples, and information on age of diagnosis, family history of cancer, and self-reported ethnicity was provided by participating studies. Family history was recorded as all first and second-degree relatives with breast or ovarian cancer. Individual analyses were performed for a family history of breast cancer and a family history of ovarian cancer as well as for a combined family history of these cancers. Information on other cancers in families was not requested for this study.

#### ***Pathology Information***

Information on the pathology of triple-negative breast cancers (TNBC) (ER, PR, HER2, histological Grade) was obtained from clinical pathology records. A TNBC case was defined as an individual with an ER-negative, PR-negative and HER2-negative (0 or 1 by immunohistochemical staining (IHC)) breast cancer diagnosed after age 18. ER-negative status was defined as <10% of the tumor cells stained for a number of participating studies, because a subset of patients were recruited from Europe (n=6) and the United States (n=6) from 1995-2011 during which time this threshold was used to identify ER-negative tumors. Histologic grade was reported using the Nottingham combined grading system. TNBCs can be defined as basal tumors by EGFR and/or CK5/6 immunohistochemical staining or by gene expression profiling. However, this information was not available in the clinical records of the majority of cases in this study.

#### ***Panel-based Mutation Analysis***

Germline DNA samples from 1824 TNBC cases were pooled in sets of three for Tru-seq library production. Libraries were bar-coded and pooled in sets of 12 for capture with an Agilent custom capture eArray containing 2X bait coverage of all coding sequences and intron/exon boundaries of coding exons from 122 DNA repair genes including 17 breast cancer predisposition genes. Products from each capture reaction were sequenced in a single lane of a HiSeq 2000 (**Figure S1**), yielding 300 reads on average for each nucleotide in each DNA sample (**Figure S2**). Sanger sequence of pooled samples was conducted to establish the origin of each called variant, such that all reported deleterious mutations were independently validated

#### ***Bioinformatics Analysis***

Paired end reads (100bp) were aligned to the hg19 reference human genome using Novoalign (Novocraft Technologies, Malaysia). Realignment and recalibration was performed using GATK (VN:1.6-7). Germline variations were called with a combination of GATK UnifiedGenotyper<sup>1</sup> and Samtools(VN 0.1.18)<sup>2</sup>. The minimum quality threshold for calling variants was set at 20. Annotations were defined using SnpEFF (VN: 3.0c)<sup>3</sup> and ANNOVAR<sup>4</sup>. Population allele frequencies were extracted from the Exome Variant Server<sup>5</sup>, 1000 Genomes<sup>6</sup> and dbSNP version 137<sup>7</sup>. Deleterious missense mutations were predicted using algorithms available in ANNOVAR<sup>4</sup> (SIFT, PolyPhen2, LRT, MutationTaster, PhyloP, GERP)<sup>8</sup>, and AlignGVGD<sup>9</sup>. Thresholds for damaging/deleterious mutations were set as follows: AlignGVGD=C65, PolyPhen2 > 0.957, SIFT < 0.05, LRT > 0.999, MutationTaster > 0.5, PhyloP > 0.95, GERP++ > 4.87, Align-GVGD C65.

#### ***Sensitivity analysis***

To estimate the sensitivity of the custom capture approach results were compared with those from clinical genetic testing of the *BRCA1* and *BRCA2* genes for a subset of KUMC TNBC samples. The 11 deleterious mutations in the KUMC dataset were identified.

## SUPPLEMENTARY RESULTS

### **Supplementary mutation testing**

Previous mutation screening of 79 patients with TNBC from POSH identified 18 mutations (22.8%). When combined with the current study (13%) the overall mutation frequency in POSH was 15.6% (42 of 269). We report the results from the current study.

### **Missense mutations**

A total of 3783 missense mutations in the 17 genes were observed in the 1824 TNBC cases. After exclusion of variants identified in >2% of cases of public controls (Exome variant server, 1000 Genomes Project, HapMap, dbSNP), 448 high quality missense mutations remained (**Table S5**). Variants were annotated for effect by SIFT, Polyphen2, LRT, PhyloP score, Mutation Taster, GERP and also by AlignGVGD. Of the 448 missense variants, 20 were predicted deleterious by all seven methods and 21 were predicted deleterious by all six models when AlignGVGD was not available. In addition, 15 were predicted deleterious by six of seven methods, and 30 were likely deleterious by five of six methods when AlignGVGD was absent. Of the combined 86 variants, 20 were excluded as deleterious because of the frequency of observations in 1000Genomes, HapMap, and ESP6500 databases, leaving 66 candidate deleterious mutations. Of five *BRCA2* variants (p.Ile2627Phe, p.Glu2663Val, p.Asp2723Gly, p.Tyr2726Cys, p.Asn3124Ile) established as deleterious<sup>10,11</sup>, only p.Ile2627Phe, which alters splicing of *BRCA2*, was not predicted deleterious by at least six of the seven predictive methods. Of four *BRCA1* missense mutations established as deleterious (p.Leu22Ser, p.Cys61Gly, p.Arg1699Gln, p.Met1775Arg)<sup>12,13</sup>, only p.Leu22Ser was not consistently recognized as likely deleterious. Thus a high proportion (80%) of the 66 missense mutations predicted as deleterious in this study, or at least those in *BRCA1* and *BRCA2*, may predispose to TNBC. Alternatively, we noted that eight of 21 *BRCA1* and *BRCA2* missense mutations observed in this study were predicted deleterious. After exclusion of the C61G *BRCA1* mutation, which was observed seven times, seven of 24 patients (29%) with *BRCA1* and *BRCA2* missense mutations were found to carry known deleterious mutations. When applying this to all carriers of predicted deleterious missense mutations we estimate that 25 patients with TNBC, or 18 (1%) when excluding those with known deleterious *BRCA1* and *BRCA2* mutations, may carry predisposing variants. Further family-based and functional studies will be needed to establish the role of missense mutations in these genes in TNBC. However, it is likely that an additional 1% to 3% of TNBC cases may be associated with deleterious missense mutations in the predisposition genes.

### **Association with tumor pathology**

Mutations in predisposition genes were not associated with an increased proportion of TNBCs with positive nodal status. However, 15% (32 of 112) of TNBC cases with mutations ( $p=2.98 \times 10^{-7}$ ) and 19% (24 of 125) *BRCA1* carriers ( $p=1.7 \times 10^{-9}$ ) exhibited bilateral or ipsilateral disease compared to 5.3% (65 of 1223) of non-mutant (WT) TNBC cases.

## SUPPLEMENTARY REFERENCES

1. McKenna A, Hanna M, Banks E, et al: The Genome Analysis Toolkit: A MapReduce framework for analyzing next-generation DNA sequencing data. *Genome Research* 20:1297-1303, 2010
2. Li H, Handsaker B, Wysoker A, et al: The Sequence Alignment/Map format and SAMtools. *Bioinformatics* 25:2078-9, 2009
3. Cingolani P, Platts A, Wang le L, et al: A program for annotating and predicting the effects of single nucleotide polymorphisms, SnpEff: SNPs in the genome of *Drosophila melanogaster* strain w1118; iso-2; iso-3. *Fly* 6:80-92, 2012
4. Wang K, Li M, Hakonarson H: ANNOVAR: functional annotation of genetic variants from high-throughput sequencing data. *Nucleic acids research* 38:e164, 2010
5. [http://evs.gs.washington.edu/evs\\_bulk\\_data/ESP6500SI.snps\\_indels.vcf.tar.gz:](http://evs.gs.washington.edu/evs_bulk_data/ESP6500SI.snps_indels.vcf.tar.gz)
6. [ftp://ftp-trace.ncbi.nih.gov/1000genomes/ftp/release/20110521/:](ftp://ftp-trace.ncbi.nih.gov/1000genomes/ftp/release/20110521/)
7. [ftp://ftp.ncbi.nih.gov/snp/organisms/human\\_9606/VCF/00-All.vcf.gz:](ftp://ftp.ncbi.nih.gov/snp/organisms/human_9606/VCF/00-All.vcf.gz)
8. Liu X, Jian X, Boerwinkle E: dbNSFP: A lightweight database of human nonsynonymous SNPs and their functional predictions. *Human Mutation* 32:894-899, 2011
9. Tavtigian SV, Deffenbaugh AM, Yin L, et al: Comprehensive statistical study of 452 BRCA1 missense substitutions with classification of eight recurrent substitutions as neutral. *Journal of medical genetics* 43:295-305, 2006
10. Farrugia DJ, Agarwal MK, Pankratz VS, et al: Functional assays for classification of BRCA2 variants of uncertain significance. *Cancer research* 68:3523-31, 2008
11. Guidugli L, Pankratz VS, Singh N, et al: A classification model for BRCA2 DNA binding domain missense variants based on homology-directed repair activity. *Cancer research* 73:265-75, 2013
12. Easton DF, Deffenbaugh AM, Pruss D, et al: A systematic genetic assessment of 1,433 sequence variants of unknown clinical significance in the BRCA1 and BRCA2 breast cancer-predisposition genes. *American journal of human genetics* 81:873-83, 2007
13. Spurdle AB, Whiley PJ, Thompson B, et al: BRCA1 R1699Q variant displaying ambiguous functional abrogation confers intermediate breast and ovarian cancer risk. *Journal of medical genetics* 49:525-32, 2012
14. Leu M, Humphreys K, Surakka I, et al: NordicDB: a Nordic pool and portal for genome-wide control data. *Eur J Hum Genet* 18:1322-6, 2010

### **Supplementary Table 1. The Triple-Negative Breast Cancer Consortium (TNBCC)**

---

**Bavarian Breast Cancer Cases and Controls (BBCC):** This is a consecutive series of cases with invasive breast cancer recruited at the University Breast Centre, Franconia in Northern Bavaria, Germany from 2002-2006. Cases were between 22-96 years of age. Controls were population-based unaffected women from the same geographical area.

**Simultaneous Study of Docetaxel Based Anthracycline Free Adjuvant treatment Evaluation, as well as Life Style Intervention Strategies (SUCCESS C):** a prospectively randomized trial for high risk breast cancer patients without metastases. All patients were at least 18 years of age, HER2 negative with an otherwise high risk of recurrence. A total of 3642 patients were recruited from March 2009 to August 2011. Whole blood samples were obtained from 742 TN cases from 3256 total patients.

**Dana Farber Cancer Institute (DFCI):** Cases were obtained from an unselected series of breast tumor patients from the Dana Farber Cancer Institute. DNA samples from residual bloods from triple negative breast cancer patients were genotyped.

**DEMOKRITOS:** Cases were enrolled from 1997 until 2010 in several major hospitals covering most geographical areas of Greece, such as Athens metropolitan area, Thessaloniki, Ioannina, Patras, and Crete (Chania), in collaboration with the Hellenic Cooperative Oncology Group (HECOG). Cases had an age range of 20-87 years. Controls were population-based unaffected women of the same age range.

**Fox Chase Cancer Center (FCCC):** Cases were seen at FCCC and 28-80 years of age at diagnosis. Comprehensive clinical data including histology, staging, treatment and outcomes was provided for all cases. Controls were healthy females with no personal cancer history matched geographically and by gender, race and age. DNA was obtained from peripheral blood samples.

**Gene Environment Interaction and Breast Cancer in Germany (GENICA):** This is a population-based case-control study of breast cancer in the Greater Bonn area of Germany. Cases were incident breast cancer cases enrolled between 2000 and 2004 (reported from 14 hospitals within the study region), all of which were enrolled within 6 months of diagnosis. Cases were between 23-80 years of age. Controls were selected from population registries from 31 communities in the greater Bonn area and matched to cases in 5-year age classes between 2001 and 2004.

**University of Kansas Medical Center (KUMC):** Cases were obtained from an unselected series of breast tumors patients from the University of Kansas Medical Center. DNA samples from residual bloods from triple negative breast cancer patients were genotyped.

**Helsinki Breast Cancer Study (HEBCS):** Cases from this hospital-based case-control study in Southern Finland were consecutive breast cancer cases from the 1) Department of Oncology, Helsinki University Central Hospital 1997-8 and 2000, 2) consecutive cases from the Department of Surgery, Helsinki University Central Hospital 2001 – 2004. Cases were between 22 and 96 years of age. The population allele and genotype frequencies were obtained from the Finnish Genome Centre on 221 healthy population controls in the NordicDB, a Nordic pool and portal for genome-wide control data <sup>14</sup>.

**Mayo Clinic Breast Cancer Study (MCBCS):** This is a clinic-based breast cancer case-control study at the Mayo Clinic. Subjects were enrolled between February 1, 2001 and June 30, 2005. Cases were comprised of Caucasian women with primary invasive breast cancer ascertained within 6 months of diagnosis. Controls were comprised of Caucasian women visiting the Mayo Clinic for general medical exams in the Department of Internal Medicine with no prior history of cancer. Controls were frequency matched to cases on region of residence, race, and 5-year age group.

**Ohio State University (OSU):** Cases were obtained from an unselected series of breast tumor patients from the Ohio State University Stefanie Spielman Breast Bank. DNA samples isolated from blood of triple negative breast cancer patients were genotyped. Controls were selected from the Columbus Area Control Sample Bank and were frequency matched for age and ethnicity to the cases.

---

---

*Prospective Study of Outcomes in Sporadic Versus Hereditary Breast Cancer (POSH)*: Cases from this prospective cohort study in the United Kingdom were aged 40 or younger at breast cancer diagnosis, recruited from oncology clinics across the UK, and diagnosed between January 2000 and December 2007.

*Roswell Park Cancer Institute (RPCI)*: This is a clinic-based case-control study of breast cancer. Cases were newly diagnosed breast cancer patients at RPCI. Data on tumor characteristics, including ER, PR and HER2 status were obtained from the Pathology Resource Network. Healthy controls were identified from family members, friends or visitors of patients with cancer other than breast, employee volunteers, and women recruited from community events.

*Sheffield Breast Cancer Study (SBCS)*: This is a hospital-based case-control study of breast cancer. The study consists of women with pathologically confirmed breast cancer recruited from surgical outpatient clinics at the Royal Hallamshire Hospital, Sheffield, 1998 – 2005 and unselected women attending the Sheffield Mammography Screening Service between Sep 2000 - Aug 2004 if their mammograms showed no evidence of a breast lesion. Cases are a mixture of prevalent and incident disease.

---

**Supplementary Table 2. List of likely deleterious mutations**

| Gene ID | HGVS Mutation nomenclature         | HGVS protein level | #Mutations |
|---------|------------------------------------|--------------------|------------|
| ATM     | c.1215delT                         | p.Asn405fs         | 1          |
| ATM     | c.4451delT                         | p.Met1484fs        | 1          |
| BARD1   | c.1525_1528dupATAG                 | p.Val510fs         | 1          |
| BARD1   | c.1932_1933delAT                   | p.Cys645X          | 1          |
| BARD1   | c.1935_1954dupTGAACAGGAAGAAAAGTATG | p.Cys645X          | 3          |
| BARD1   | c.2002-2A>C                        |                    | 1          |
| BARD1   | c.2300_2301delTG                   | p.Val767fs         | 1          |
| BARD1   | c.824T>A                           | p.Leu275X          | 1          |
| BARD1   | c.896insG                          | p.Pro300fs         | 1          |
| BRCA1   | BART dup exons 18-19               |                    | 1          |
| BRCA1   | c.1016delA                         | p.Lys339fs         | 1          |
| BRCA1   | c.1059G>A                          | p.Trp353X          | 1          |
| BRCA1   | c.1116G>A                          | p.Trp372X          | 1          |
| BRCA1   | c.1299_1302dupCAGT                 | p.Asp435fs         | 1          |
| BRCA1   | c.135-1G>T                         |                    | 2          |
| BRCA1   | c.1500_1504delTAAAT                | p.Leu502fs         | 2          |
| BRCA1   | c.1601_1602delAG                   | p.Gln534fs         | 1          |
| BRCA1   | c.1621C>T                          | p.Gln541X          | 1          |
| BRCA1   | #c.181T>G                          | p.Cys61Gly         | 7          |
| BRCA1   | c.1823_1826delAGAA                 | p.Lys608fs         | 1          |
| BRCA1   | c.1874_1877dupTAGT                 | p.Val627fs         | 2          |
| BRCA1   | c.1916T>A                          | p.Leu639X          | 1          |
| BRCA1   | c.1950_1953delAAAG                 | pLys653fs          | 1          |
| BRCA1   | c.1953dupG                         | p.Lys652fs         | 1          |
| BRCA1   | c.1961delA                         | p.Lys654fs         | 1          |
| BRCA1   | c.1961dupA                         | p.Tyr655fs         | 1          |
| BRCA1   | c.2035A>T                          | p.Lys679X          | 1          |
| BRCA1   | c.2071delA                         | p.Arg691fs         | 1          |
| BRCA1   | c.2077delG                         | p.Asp693fs         | 1          |
| BRCA1   | c.213-11T>G                        |                    | 3          |
| BRCA1   | c.2309C>A                          | p.Ser770X          | 1          |
| BRCA1   | c.2411_2412delAG                   | p.Gln804fs         | 1          |
| BRCA1   | c.2457delC                         | p.Asp821fs         | 1          |
| BRCA1   | c.2475delC                         | p.Asp825fs         | 1          |
| BRCA1   | c.2676_2679delAAAG                 | p.Lys893fs         | 1          |
| BRCA1   | c.2679_2682delGAAA                 | p.Ly893fs          | 1          |
| BRCA1   | c.2681_2682delAA                   | p.Lys894fs         | 4          |
| BRCA1   | c.2722G>T                          | p.Glu908X          | 3          |
| BRCA1   | c.2934T>G                          | p.Tyr978X          | 1          |
| BRCA1   | c.3005delA                         | p.Asn1002fs        | 1          |
| BRCA1   | c.302-2_302-2delA                  |                    | 1          |
| BRCA1   | c.3084_3094delTAATAACATTA          | p.Asn1029fs        | 1          |
| BRCA1   | c.329dupA                          | p.Glu111fs         | 4          |
| BRCA1   | c.3400G>T                          | p.Glu1134X         | 1          |
| BRCA1   | c.3436_3439delTGTT                 | p.Cys1146X         | 1          |
| BRCA1   | c.3481_3491delGAAGATACTAG          | p.Glu1161fs        | 2          |
| BRCA1   | c.3485delA                         | p.Asp1162fs        | 1          |
| BRCA1   | c.3607C>T                          | p.Arg1203X         | 1          |
| BRCA1   | c.3661G>T                          | p.Glu1221X         | 1          |
| BRCA1   | c.3700_3704delGTAAA                | p.Val1234fs        | 2          |
| BRCA1   | c.3748G>T                          | p.Glu1250X         | 1          |
| BRCA1   | c.3756_3759delGTCT                 | p.Ser1253fs        | 4          |
| BRCA1   | c.3770_3771delAG                   | p.Glu1257fs        | 1          |
| BRCA1   | c.3869_3870delAA                   | p.Arg1290fs        | 1          |

|       |                     |              |    |
|-------|---------------------|--------------|----|
| BRCA1 | c.3916_3917delTT    | p.Leu1306fs  | 1  |
| BRCA1 | c.4035delA          | p.Glu1346fs  | 1  |
| BRCA1 | c.4065_4068delTCAA  | p.Asn1355fs  | 5  |
| BRCA1 | c.4165_4166delAG    | p.Ser1389X   | 2  |
| BRCA1 | c.4183C>T           | p.Gln1395X   | 1  |
| BRCA1 | c.4251_4252delGT    | p.Leu1418fs  | 1  |
| BRCA1 | c.4258C>T           | p.Gln1420X   | 1  |
| BRCA1 | c.427G>T            | p.Glu143X    | 3  |
| BRCA1 | c.4327C>T           | p.Arg1443X   | 3  |
| BRCA1 | c.4357+1G>A         |              | 2  |
| BRCA1 | c.4524G>A           | p.Trp1508X   | 2  |
| BRCA1 | c.4675+1G>A         |              | 1  |
| BRCA1 | c.4676-1G>A         |              | 1  |
| BRCA1 | c.4689C>G           | p.Tyr1563X   | 2  |
| BRCA1 | c.4932_4933dupAA    | p.Arg1645fs  | 1  |
| BRCA1 | c.5030_5033delCTAA  | p.Thr1677fs  | 1  |
| BRCA1 | c.5074+1G>A         |              | 1  |
| BRCA1 | #c.5096G>A          | p.Arg1699Gln | 1  |
| BRCA1 | c.5137delG          | p.Val1713X   | 1  |
| BRCA1 | c.5177_5180delGAAA  | p.Arg1726fs  | 1  |
| BRCA1 | c.520delC           | p.Gln174fs   | 1  |
| BRCA1 | *c.5266dupC         | p.Gln1756fs  | 19 |
| BRCA1 | #c.5324T>G          | p.Met1775Arg | 1  |
| BRCA1 | c.5328delC          | p.Thr1777fs  | 1  |
| BRCA1 | c.5386delT          | p.Ser1796fs  | 1  |
| BRCA1 | c.5431C>T           | p.Gln1811X   | 2  |
| BRCA1 | c.547+2T>A          |              | 1  |
| BRCA1 | c.5503C>T           | p.Arg1835X   | 3  |
| BRCA1 | #c.65T>C            | p.Leu22Ser   | 1  |
| BRCA1 | *c.68_69delAG       | p.Glu23fs    | 18 |
| BRCA1 | c.697_698delGT      | p.Val233fs   | 1  |
| BRCA1 | c.929delA           | p.Gln310fs   | 1  |
| BRCA1 | c.962G>A            | p.Trp321X    | 3  |
| BRCA1 | exon 22del510bp     |              | 1  |
| BRCA2 | c.1364delC          | p.Ser455X    | 1  |
| BRCA2 | c.145G>T            | p.Glu49X     | 1  |
| BRCA2 | c.1813dupA          | p.Ile605fs   | 5  |
| BRCA2 | c.2339C>G           | p.Ser780X    | 1  |
| BRCA2 | c.2836_2837delGA    | p.Asp946fs   | 1  |
| BRCA2 | c.3002C>G           | p.Ser1001X   | 1  |
| BRCA2 | c.3199delA          | p.Thr1067fs  | 1  |
| BRCA2 | c.3847_3848delGT    | p.Val1283fs  | 1  |
| BRCA2 | c.4588A>T           | p.Lys1530X   | 1  |
| BRCA2 | c.4729G>T           | p.Glu1577X   | 1  |
| BRCA2 | c.5071A>T           | p.Lys1691X   | 1  |
| BRCA2 | c.5073dupA          | p.Trp1692fs  | 1  |
| BRCA2 | c.516+2T>A          |              | 1  |
| BRCA2 | c.517-1_517-1delG   |              | 1  |
| BRCA2 | c.5641_5644delAAAT  | p.Lys1881fs  | 1  |
| BRCA2 | c.5806_5807delAT    | p.Met1936fs  | 1  |
| BRCA2 | c.5857G>T           | p.Glu1953X   | 1  |
| BRCA2 | *c.5946delT         | p.Ser1982fs  | 6  |
| BRCA2 | c.6275_6276delTT    | p.Leu2092fs  | 3  |
| BRCA2 | c.6405_6409delCTTAA | p.Asn2135fs  | 1  |
| BRCA2 | c.6486_6489delACAA  | p.Lys2162fs  | 1  |
| BRCA2 | c.6941delC          | p.Thr2314fs  | 1  |



|        |                      |              |   |
|--------|----------------------|--------------|---|
| BRCA2  | c.7024C>T            | p.Gln2342X   | 1 |
| BRCA2  | c.7480C>T            | p.Arg2494X   | 1 |
| BRCA2  | c.774_775delAA       | p.Glu260fs   | 1 |
| BRCA2  | c.7878G>A            | p.Trp2626X   | 1 |
| BRCA2  | #c.7879A>T           | p.Ile2627Phe | 1 |
| BRCA2  | c.7913_7917delTTCCCT | p.Phe2638X   | 1 |
| BRCA2  | #c.7988A>T           | p.Glu2663Val | 1 |
| BRCA2  | #c.8168A>G           | p.Asp2723Gly | 1 |
| BRCA2  | #c.8177A>G           | p.Tyr2726Cys | 1 |
| BRCA2  | c.8537_8538delAG     | p.Glu2846fs  | 1 |
| BRCA2  | c.8761_8762delTT     | p.Phe2921fs  | 1 |
| BRCA2  | c.9196C>T            | p.Gln3066X   | 1 |
| BRCA2  | c.9257-1G>C          |              | 1 |
| BRCA2  | #c.9371A>T           | p.Asn3124Ile | 1 |
| BRCA2  | c.9382C>T            | p.Arg3128X   | 1 |
| BRCA2  | c.9672dupA           | p.Tyr3225fs  | 1 |
| BRIP1  | c.1341-1G>C          |              | 1 |
| BRIP1  | c.2038_2039dupTT     | p.Leu660fs   | 1 |
| BRIP1  | c.2108delAinsTCC     | p.Lys703fs   | 1 |
| BRIP1  | c.2392C>T            | p.Arg798X    | 3 |
| BRIP1  | c.2765T>G            | p.Leu922X    | 1 |
| BRIP1  | c.440dupA            | p.Tyr147X    | 1 |
| MRE11A | c.1514G>T            | p.Glu506X    | 1 |
| MRE11A | c.1726C>T            | p.Arg576X    | 1 |
| NBN    | c.657_661delACAAA    | p.Lys219fs   | 1 |
| PALB2  | c.123delT            | p.Glu42fs    | 1 |
| PALB2  | c.156delA            | p.Glu53fs    | 1 |
| PALB2  | c.1592delT           | p.Leu531fs   | 3 |
| PALB2  | c.172_175delTTGT     | p.Leu58fs    | 2 |
| PALB2  | c.2257C>T            | p.Arg753X    | 1 |
| PALB2  | c.2470dupT           | p.Cys824fs   | 1 |
| PALB2  | c.3116delA           | p.Asn1039fs  | 1 |
| PALB2  | c.3323delA           | p.Tyr1108fs  | 2 |
| PALB2  | c.3361delG           | p.Gly1121fs  | 1 |
| PALB2  | c.3456dupA           | p.Pro1153fs  | 1 |
| PALB2  | c.3549C>G            | p.Tyr1183X   | 1 |
| PALB2  | c.49-2A>T            |              | 1 |
| PALB2  | c.509_510delGA       | p.Arg170fs   | 2 |
| PALB2  | c.688G>T             | p.Glu230X    | 1 |
| PALB2  | c.93dupA             | p.Leu32fs    | 1 |
| PALB2  | c.956_962delCTAATTT  | p.Ser319X    | 1 |
| PTEN   | c.790delA            | p.Met264fs   | 1 |
| RAD50  | c.1875C>G            | p.Tyr625X    | 2 |
| RAD50  | c.2165dupA           | p.Glu723fs   | 1 |
| RAD50  | c.326_329delCAGA     | p.Thr109fs   | 1 |
| RAD50  | c.687delT            | p.Ser229fs   | 1 |
| RAD50  | c.832C>T             | p.Arg278X    | 1 |
| RAD51C | c.706-2A>G           |              | 5 |
| RAD51C | c.955C>T             | p.Arg319X    | 1 |
| RAD51D | c.144+1G>T           |              | 1 |
| RAD51D | c.478C>T             | p.Gln160X    | 1 |
| RAD51D | c.564delT            | p.Val189fs   | 1 |
| RAD51D | c.623dupT            | p.Thr209fs   | 1 |
| RAD51D | c.748delC            | p.His250fs   | 2 |
| RAD51D | c.898C>T             | p.Arg300X    | 1 |
| TP53   | #c.743G>A            | p.Arg248Gln  | 1 |

|       |          |           |     |
|-------|----------|-----------|-----|
| XRCC2 | c.377T>A | p.Leu126X | 1   |
| XRCC2 | c.96delT | p.Phe32fs | 2   |
|       |          | Total     | 271 |

\* BRCA1 and BRCA2 Ashkenazi Jewish founder mutations; #known deleterious missense mutations

**Supplementary Table 3. Gene-specific deleterious mutations by study**

| <u>Gene</u>        | <u>BBC</u><br>n=270 | <u>DEMOKRITOS</u><br>n=223 | <u>DFCI</u><br>n=252 | <u>FCCC</u><br>n=108 | <u>GENICA</u><br>n=48 | <u>HEBCS</u><br>n=87 | <u>KUMC</u><br>n=87 | <u>MCBCS</u><br>n=186 | <u>OSU</u><br>n=205 | <u>POSH</u><br>n=190 | <u>RPCI</u><br>n=75 | <u>SBCS</u><br>n=30 |
|--------------------|---------------------|----------------------------|----------------------|----------------------|-----------------------|----------------------|---------------------|-----------------------|---------------------|----------------------|---------------------|---------------------|
| ATM                | 1                   | 1                          | 0                    | 0                    | 0                     | 0                    | 0                   | 0                     | 0                   | 0                    | 0                   | 0                   |
| BRCA1              | 21                  | 11                         | 40                   | 13                   | 2                     | 3                    | 11                  | 10                    | 22                  | 16                   | 6                   | 0                   |
| BRCA2              | 9                   | 6                          | 8                    | 5                    | 0                     | 1                    | 2                   | 3                     | 4                   | 5                    | 3                   | 3                   |
| BARD1              | 1                   | 3                          | 0                    | 1                    | 0                     | 1                    | 0                   | 1                     | 1                   | 0                    | 1                   | 0                   |
| BRIP1              | 1                   | 0                          | 1                    | 0                    | 0                     | 0                    | 0                   | 1                     | 3                   | 1                    | 1                   | 0                   |
| CDH1               | 0                   | 0                          | 0                    | 0                    | 0                     | 0                    | 0                   | 0                     | 0                   | 0                    | 0                   | 0                   |
| CHEK2              | 0                   | 0                          | 0                    | 0                    | 0                     | 0                    | 0                   | 0                     | 0                   | 0                    | 0                   | 0                   |
| MRE11A             | 0                   | 0                          | 1                    | 0                    | 0                     | 0                    | 0                   | 0                     | 1                   | 0                    | 0                   | 0                   |
| NBN                | 1                   | 0                          | 0                    | 0                    | 0                     | 0                    | 0                   | 0                     | 0                   | 0                    | 0                   | 0                   |
| PALB2              | 2                   | 2                          | 5                    | 2                    | 0                     | 3                    | 0                   | 2                     | 4                   | 0                    | 1                   | 0                   |
| PTEN               | 0                   | 1                          | 0                    | 0                    | 0                     | 0                    | 0                   | 0                     | 0                   | 0                    | 0                   | 0                   |
| RAD50              | 0                   | 1                          | 2                    | 0                    | 0                     | 1                    | 0                   | 0                     | 1                   | 0                    | 1                   | 0                   |
| RAD51C             | 2                   | 1                          | 2                    | 0                    | 0                     | 0                    | 0                   | 1                     | 0                   | 0                    | 0                   | 0                   |
| RAD51D             | 2                   | 0                          | 1                    | 1                    | 0                     | 0                    | 1                   | 0                     | 0                   | 2                    | 0                   | 0                   |
| STK11              | 0                   | 0                          | 0                    | 0                    | 0                     | 0                    | 0                   | 0                     | 0                   | 0                    | 0                   | 0                   |
| TP53               | 0                   | 0                          | 1                    | 0                    | 0                     | 0                    | 0                   | 0                     | 0                   | 0                    | 0                   | 0                   |
| XRCC2              | 0                   | 0                          | 0                    | 0                    | 0                     | 0                    | 0                   | 1                     | 2                   | 0                    | 0                   | 0                   |
| <b>Total</b>       | 40                  | 26                         | 61                   | 22                   | 2                     | 9                    | 14                  | 19                    | 38                  | 24                   | 13                  | 3                   |
| <b>% Mutations</b> | 15%                 | 12%                        | 24%                  | 20%                  | 4%                    | 10%                  | 16%                 | 10%                   | 19%                 | 13%                  | 17%                 | 10%                 |

**Supplementary Table 4. TNBC cases with two independent deleterious mutations.**

| ID      | study | famhist | bilateral | grade | nodes | stage | agedx | Gene ID | position | cDNA                | Protein           |
|---------|-------|---------|-----------|-------|-------|-------|-------|---------|----------|---------------------|-------------------|
| TN07831 | MCBCS | 0       | 1         | 3     | 0     | 3     | 68    | BRCA1   | 41276044 | c.68_69delAG        | p.Glu23ValfsX17   |
| TN07831 | MCBCS | 0       | 1         | 3     | 0     | 3     | 68    | BRCA2   | 32914437 | c.5946delT          | p.Ser1982ArgfsX22 |
| TN06850 | BBCC  | 0       | 0         | 3     | 1     | 3     | 49    | BRCA2   | 32936733 | c.7879A>T           | p.Ile2627Phe      |
| TN06850 | BBCC  | 0       | 0         | 3     | 1     | 3     | 49    | PALB2   | 23641004 | c.2470dupT          | p.Cys824LeufsX2   |
| TN03008 | MCBCS | 1       | 1         | 2     | 0     | 1     | 38    | BRCA1   | 41245594 | c.1950_1953delAAAAG | p.Lys652GlufsX21  |
| TN03008 | MCBCS | 1       | 1         | 2     | 0     | 1     | 38    | BRIP1   | 59793412 | c.2392C>T           | p.Arg798X         |
| TN01532 | FCCC  | 0       | 0         | 3     | 1     | 2     | 39    | PALB2   | 23647179 | c.688G>T            | p.Glu230X         |
| TN01532 | FCCC  | 0       | 0         | 3     | 1     | 2     | 39    | RAD51D  | 33433416 | c.564delT           | p.Val189TrpfsX5   |

**Supplementary Table 5. Phenotypic categories for TNBC cases with likely deleterious mutations**

|                                                    |             | ATM | BARD1 | BRCA1 | BRCA2 | BRIP1 | MRE11A | NBN | PALB2 | PTEN | RAD50 | RAD51C | RAD51D | TP53 | XRCC2 | WT    |
|----------------------------------------------------|-------------|-----|-------|-------|-------|-------|--------|-----|-------|------|-------|--------|--------|------|-------|-------|
| <b>Bilateral</b>                                   | unilateral  | 0   | 6     | 101   | 34    | 5     | 2      | 0   | 16    | 1    | 5     | 4      | 4      | 0    | 2     | 1,158 |
|                                                    | bilateral   | 1   | 1     | 18    | 3     | 1     | 0      | 0   | 0     | 0    | 0     | 0      | 1      | 0    | 0     | 57    |
|                                                    | ipsilateral | 0   | 0     | 6     | 0     | 0     | 0      | 0   | 0     | 0    | 0     | 0      | 0      | 1    | 0     | 8     |
| <b>Grade</b>                                       | 1           | 0   | 0     | 1     | 0     | 0     | 0      | 0   | 0     | 0    | 0     | 0      | 0      | 0    | 1     | 18    |
|                                                    | 2           | 1   | 2     | 6     | 4     | 2     | 0      | 0   | 2     | 0    | 0     | 0      | 1      | 0    | 0     | 196   |
|                                                    | 3           | 1   | 5     | 105   | 35    | 4     | 2      | 1   | 9     | 1    | 3     | 6      | 5      | 0    | 0     | 940   |
| <b>Stage</b>                                       | 0           | 0   | 0     | 2     | 0     | 0     | 0      | 0   | 0     | 0    | 0     | 0      | 0      | 0    | 0     | 6     |
|                                                    | 1           | 0   | 4     | 59    | 11    | 4     | 1      | 1   | 4     | 0    | 2     | 3      | 2      | 1    | 0     | 410   |
|                                                    | 2           | 1   | 1     | 43    | 18    | 2     | 1      | 0   | 6     | 0    | 2     | 2      | 1      | 0    | 1     | 502   |
|                                                    | 3           | 0   | 3     | 7     | 6     | 0     | 0      | 0   | 6     | 0    | 0     | 2      | 0      | 0    | 1     | 137   |
|                                                    | 4           | 0   | 0     | 1     | 2     | 0     | 0      | 0   | 1     | 0    | 0     | 0      | 1      | 0    | 0     | 42    |
| <b>Node Status</b>                                 | Negative    | 1   | 4     | 79    | 23    | 5     | 2      | 1   | 6     | 0    | 3     | 4      | 3      | 1    | 0     | 650   |
|                                                    | Positive    | 0   | 4     | 31    | 14    | 2     | 0      | 0   | 12    | 1    | 1     | 2      | 1      | 0    | 2     | 496   |
| <b>Breast Ca. History<br/>(1st or 2nd Degree)</b>  | No          | 2   | 3     | 66    | 24    | 5     | 1      | 0   | 10    | 0    | 3     | 4      | 3      | 0    | 2     | 873   |
|                                                    | Yes         | 0   | 2     | 66    | 16    | 3     | 1      | 1   | 5     | 1    | 2     | 1      | 3      | 1    | 1     | 413   |
| <b>Ovarian Ca. History<br/>(1st or 2nd Degree)</b> | No          | 2   | 5     | 108   | 35    | 8     | 2      | 1   | 15    | 1    | 5     | 5      | 5      | 1    | 3     | 1254  |
|                                                    | Yes         | 0   | 0     | 24    | 5     | 0     | 0      | 0   | 0     | 0    | 0     | 0      | 1      | 0    | 0     | 32    |

**Supplementary Table 6. Predicted deleterious missense mutations**

| Gene   | Chr   | Position  | REF | ALT | # | Mutation | rsID        | A-GVGD Class | A-GVGD Result | SIFT | POLY-PHEN2 | POLY-PHEN2 | LRT | PHYLO-P | PHYLO-P | MT    | MT  | GERP_GT2 | GERP_GT2 | #Del |
|--------|-------|-----------|-----|-----|---|----------|-------------|--------------|---------------|------|------------|------------|-----|---------|---------|-------|-----|----------|----------|------|
| ATM    | chr11 | 108218084 | T   | C   | 1 | I2888T   | .           | Class C65    | del           | del  | 0.999      | del        | del | 0.997   | del     | 0.990 | del | 5.52     | del      | 7    |
| ATM    | chr11 | 108224555 | A   | G   | 2 | R2912G   | .           | Class C65    | del           | del  | 1          | del        | del | 0.998   | del     | 0.948 | del | 5.42     | del      | 7    |
| ATM    | chr11 | 108180934 | A   | G   | 1 | N1937S   | .           | Class C15    | ben           | del  | 0.991      | del        | del | 0.999   | del     | 0.550 | del | 5.7      | del      | 6    |
| BARD1  | chr2  | 215593443 | A   | G   | 1 | I764T    | .           | .            | Unk           | del  | 0.99       | del        | del | 0.970   | del     | 0.920 | del | 5.63     | del      | 6    |
| BARD1  | chr2  | 215593566 | T   | C   | 1 | H723R    | .           | .            | Unk           | del  | 1          | del        | del | 0.084   | ben     | 0.989 | del | 5.81     | del      | 5    |
| BRCA1  | chr17 | 41209139  | A   | G   | 1 | V1736A   | rs45553935  | Class C65    | del           | del  | 0.975      | del        | del | 0.999   | del     | 0.878 | del | 5.07     | del      | 7    |
| BRCA1  | chr17 | 41215389  | C   | A   | 1 | W1718C   | rs80357239  | Class C65    | del           | del  | 1          | del        | del | 0.999   | del     | 0.999 | del | 5.46     | del      | 7    |
| BRCA1  | chr17 | 41256941  | A   | G   | 1 | L82P     | .           | Class C65    | del           | del  | 0.969      | del        | del | 0.999   | del     | 0.998 | del | 5.3      | del      | 7    |
| BRCA1  | chr17 | 41258504  | A   | C   | 7 | C61G     | rs28897672  | Class C65    | del           | del  | 1          | del        | del | 0.998   | del     | 0.989 | del | 5.17     | del      | 7    |
| BRCA1  | chr17 | 41203088  | A   | C   | 1 | M1775R   | rs41293463  | Class C45    | ben           | del  | 1          | del        | del | 0.999   | del     | 0.998 | del | 5.21     | del      | 6    |
| BRCA1  | chr17 | 41215947  | C   | T   | 1 | R1699Q   | rs41293459  | Class C35    | ben           | del  | 1          | del        | del | 0.999   | del     | 0.902 | del | 5.83     | del      | 6    |
| BRCA1  | chr17 | 41219642  | T   | C   | 1 | H1686R   | .           | Class C25    | ben           | del  | 1          | del        | del | 0.998   | del     | 0.913 | del | 5.24     | del      | 6    |
| BRCA1  | chr17 | 41244952  | G   | A   | 3 | R866C    | rs41286300  | Class C65    | del           | del  | 1          | del        | ben | 1.000   | del     | 0.982 | del | 5.15     | del      | 6    |
| BRCA2  | chr13 | 32937327  | A   | T   | 1 | E2663V   | rs80359031  | Class C65    | del           | del  | 0.999      | del        | del | 0.998   | del     | 0.920 | del | 4.93     | del      | 7    |
| BRCA2  | chr13 | 32937507  | A   | G   | 1 | D2723G   | rs41293513  | Class C65    | del           | del  | 1          | del        | del | 0.999   | del     | 0.895 | del | 5.49     | del      | 7    |
| BRCA2  | chr13 | 32937516  | A   | G   | 1 | Y2726C   | rs80359064  | Class C65    | del           | del  | 1          | del        | del | 0.999   | del     | 0.954 | del | 5.49     | del      | 7    |
| BRCA2  | chr13 | 32937642  | T   | A   | 1 | L2768H   | .           | Class C65    | del           | del  | 0.998      | del        | del | 0.998   | del     | 0.882 | del | 5.68     | del      | 7    |
| BRCA2  | chr13 | 32944642  | G   | A   | 2 | G2812E   | rs80359091  | Class C65    | del           | del  | 0.999      | del        | del | 0.999   | del     | 0.947 | del | 5.19     | del      | 7    |
| BRCA2  | chr13 | 32954031  | C   | T   | 1 | T3033I   | .           | Class C65    | del           | del  | 0.999      | del        | del | 0.999   | del     | 0.838 | del | 5.66     | del      | 7    |
| BRCA2  | chr13 | 32968940  | A   | T   | 1 | N3124I   | rs28897759  | Class C65    | del           | del  | 1          | del        | del | 0.999   | del     | 0.927 | del | 5.89     | del      | 7    |
| BRCA2  | chr13 | 32972522  | C   | G   | 2 | S3291C   | rs200210279 | Class C65    | del           | del  | 0.991      | del        | del | 0.999   | del     | 0.819 | del | 5.74     | del      | 7    |
| BRCA2  | chr13 | 32911818  | C   | T   | 1 | A1109V   | rs41293479  | Class C0     | ben           | del  | 0.98       | del        | del | 0.999   | del     | 0.813 | del | 5.75     | del      | 6    |
| BRCA2  | chr13 | 32913062  | T   | G   | 1 | F1524V   | rs56386506  | Class C45    | ben           | del  | 0.999      | del        | del | 0.998   | del     | 0.960 | del | 5.74     | del      | 6    |
| BRCA2  | chr13 | 32915190  | C   | A   | 1 | A2233D   | rs41293501  | Class C15    | ben           | del  | 0.995      | del        | del | 0.999   | del     | 0.958 | del | 5.71     | del      | 6    |
| BRCA2  | chr13 | 32920979  | G   | A   | 1 | R2318Q   | rs80358921  | Class C0     | ben           | del  | 0.999      | del        | del | 0.999   | del     | 0.712 | del | 5.03     | del      | 6    |
| BRCA2  | chr13 | 32930688  | G   | T   | 1 | R2520L   | .           | Class C65    | del           | del  | 1          | del        | del | 0.994   | del     | 0.977 | del | 4.63     | ben      | 6    |
| BRIP1  | chr17 | 59770799  | T   | C   | 1 | Y856C    | .           | .            | Unk           | del  | 0.999      | del        | del | 0.998   | del     | 0.954 | del | 5.74     | del      | 6    |
| BRIP1  | chr17 | 59821942  | T   | A   | 1 | K703I    | .           | .            | Unk           | del  | 0.992      | del        | del | 0.962   | del     | 0.837 | del | 5.63     | del      | 6    |
| BRIP1  | chr17 | 59858343  | G   | T   | 1 | A551E    | .           | .            | Unk           | del  | 0.981      | del        | del | 0.999   | del     | 0.680 | del | 5.17     | del      | 6    |
| BRIP1  | chr17 | 59870990  | C   | A   | 1 | G481C    | .           | .            | Unk           | del  | 0.999      | del        | del | 0.998   | del     | 0.979 | del | 5.24     | del      | 6    |
| BRIP1  | chr17 | 59937223  | G   | C   | 3 | P47A     | rs28903098  | .            | Unk           | del  | 0.999      | del        | del | 1.000   | del     | 0.925 | del | 5.26     | del      | 6    |
| BRIP1  | chr17 | 59853875  | C   | T   | 1 | A662T    | .           | .            | Unk           | del  | 0.98       | del        | del | 0.999   | del     | 0.453 | ben | 5.58     | del      | 5    |
| BRIP1  | chr17 | 59853913  | C   | G   | 1 | G649A    | .           | .            | Unk           | tol  | 0.995      | del        | del | 0.999   | del     | 0.635 | del | 5.69     | del      | 5    |
| BRIP1  | chr17 | 59876594  | G   | A   | 2 | R403W    | .           | .            | Unk           | del  | 1          | del        | del | 0.963   | del     | 0.996 | del | 3.73     | ben      | 5    |
| BRIP1  | chr17 | 59878714  | A   | G   | 1 | L347P    | .           | .            | Unk           | del  | 0.998      | del        | ben | 0.998   | del     | 0.966 | del | 5        | del      | 5    |
| CHEK2  | chr22 | 29121058  | C   | T   | 1 | G167R    | rs72552322  | Class C65    | del           | del  | 0.999      | del        | del | 0.999   | del     | 1.000 | del | 5.87     | del      | 7    |
| CHEK2  | chr22 | 29090060  | C   | T   | 2 | R474H    | rs121908706 | Class C25    | ben           | del  | 1          | del        | del | 0.998   | del     | 1.000 | del | 5.46     | del      | 6    |
| CHEK2  | chr22 | 29091220  | A   | G   | 1 | Y424H    | rs139366548 | Class C0     | ben           | del  | 0.998      | del        | del | 0.999   | del     | 0.999 | del | 5.81     | del      | 6    |
| MRE11A | chr11 | 94192612  | G   | A   | 4 | R488C    | .           | .            | Unk           | del  | 0.993      | del        | del | 1.000   | del     | 0.994 | del | 5.89     | del      | 6    |
| MRE11A | chr11 | 94204759  | G   | A   | 1 | P276S    | .           | .            | Unk           | del  | 0.992      | del        | del | 1.000   | del     | 0.997 | del | 5.45     | del      | 6    |

|        |       |           |   |   |   |        |             |           |     |     |       |     |     |       |     |       |     |      |     |   |
|--------|-------|-----------|---|---|---|--------|-------------|-----------|-----|-----|-------|-----|-----|-------|-----|-------|-----|------|-----|---|
| MRE11A | chr11 | 94211916  | C | T | 2 | A177T  | rs142996063 | .         | Unk | del | 0.997 | del | del | 0.999 | del | 0.999 | del | 5.54 | del | 6 |
| MRE11A | chr11 | 94192594  | C | T | 2 | E494K  | rs104895016 | .         | Unk | del | 0.303 | ben | del | 0.999 | del | 0.988 | del | 5.89 | del | 5 |
| NBN    | chr8  | 90949269  | G | A | 1 | A740V  | .           | .         | Unk | del | 0.993 | del | del | 0.991 | del | 0.197 | ben | 5.22 | del | 5 |
| PALB2  | chr16 | 23635372  | A | C | 2 | L931R  | .           | .         | Unk | del | 0.996 | del | del | 0.999 | del | 0.918 | del | 5.81 | del | 6 |
| PALB2  | chr16 | 23637693  | T | C | 1 | D871G  | .           | .         | Unk | del | 0.999 | del | del | 0.998 | del | 0.962 | del | 5.93 | del | 6 |
| PALB2  | chr16 | 23637686  | A | C | 1 | S873R  | .           | .         | Unk | del | 0.999 | del | del | 0.973 | del | 0.964 | del | 3.31 | ben | 5 |
| PTEN   | chr10 | 89685278  | A | G | 1 | D58G   | .           | .         | Unk | del | 0.981 | del | del | 0.998 | del | 1.000 | del | 5.46 | del | 6 |
| RAD50  | chr5  | 131893071 | G | T | 1 | D19Y   | .           | .         | Unk | del | 0.986 | del | del | 1.000 | del | 0.999 | del | 5.72 | del | 6 |
| RAD50  | chr5  | 131895049 | A | G | 1 | H68R   | .           | .         | Unk | del | 0.999 | del | del | 0.998 | del | 0.998 | del | 4.98 | del | 6 |
| RAD50  | chr5  | 131911482 | C | T | 1 | T76I   | .           | .         | Unk | del | 0.983 | del | del | 0.999 | del | 0.989 | del | 5.75 | del | 6 |
| RAD50  | chr5  | 131911500 | T | A | 1 | I82N   | .           | .         | Unk | del | 0.998 | del | del | 0.998 | del | 0.998 | del | 5.75 | del | 6 |
| RAD50  | chr5  | 131915097 | A | T | 1 | N152Y  | .           | .         | Unk | del | 0.978 | del | del | 0.999 | del | 0.997 | del | 5.69 | del | 6 |
| RAD50  | chr5  | 131911515 | G | A | 1 | R87H   | .           | .         | Unk | del | 0.935 | ben | del | 1.000 | del | 0.902 | del | 5.75 | del | 5 |
| RAD50  | chr5  | 131923282 | T | G | 1 | L262R  | rs201728859 | .         | Unk | del | 0.831 | ben | del | 0.998 | del | 0.990 | del | 5.77 | del | 5 |
| RAD50  | chr5  | 131939181 | G | C | 1 | Q799H  | rs61749630  | .         | Unk | del | 0.746 | ben | del | 0.999 | del | 0.729 | del | 5.16 | del | 5 |
| RAD50  | chr5  | 131944882 | G | A | 1 | G968E  | rs199895166 | .         | Unk | del | 0.03  | ben | del | 0.985 | del | 0.977 | del | 4.98 | del | 5 |
| RAD50  | chr5  | 131953931 | A | T | 1 | R1112W | .           | .         | Unk | del | 0.993 | del | del | 0.999 | del | 0.994 | del | 4.16 | ben | 5 |
| RAD50  | chr5  | 131972857 | T | C | 1 | I1147T | .           | .         | Unk | del | 0.881 | ben | del | 0.999 | del | 1.000 | del | 6.17 | del | 5 |
| RAD50  | chr5  | 131976470 | T | C | 1 | I1242T | .           | .         | Unk | del | 0.953 | ben | del | 0.999 | del | 1.000 | del | 6.16 | del | 5 |
| RAD51D | chr17 | 33430511  | G | A | 1 | A210V  | .           | .         | Unk | del | 0.783 | ben | del | 1.000 | del | 1.000 | del | 5.05 | del | 5 |
| RAD51D | chr17 | 33430520  | G | A | 4 | S207V  | .           | .         | Unk | del | 0.789 | ben | del | 1.000 | del | 1.000 | del | 5.05 | del | 5 |
| STK11  | chr19 | 1226569   | C | T | 1 | R409W  | .           | .         | Unk | del | NA    | del | del | NA    | del | NA    | del | NA   | del | 6 |
| STK11  | chr19 | 1206943   | A | G | 1 | M11V   | .           | .         | Unk | tol | NA    | del | del | NA    | del | NA    | del | NA   | del | 5 |
| STK11  | chr19 | 1220466   | G | A | 2 | G187S  | .           | .         | Unk | tol | NA    | del | del | NA    | del | NA    | del | NA   | del | 5 |
| STK11  | chr19 | 1220595   | G | A | 1 | A205T  | .           | .         | Unk | tol | NA    | del | del | NA    | del | NA    | del | 5.56 | del | 5 |
| TP53   | chr17 | 7574027   | C | G | 1 | G334R  | .           | Class C65 | del | del | 1     | del | del | 0.999 | del | 1.000 | del | 5.43 | del | 7 |

Del: deleterious; ben: benign; Unk: unknown; tol: tolerated; #: number; MT: Mutation Taster

## **Supplementary Figure Legends**

**Supplemental Figure 1. Schematic of mutation screening protocol.** DNA samples were pooled in sets of three for library production, pooled again in batches of 12 libraries for capture and sequencing. All likely deleterious mutations were Sanger validated in individual samples.

**Supplemental Figure 2. Quality control of sequencing.** A) Average coverage of exons with read depth on the x-axis and number of exons on the y-axis. B) Frequency of alternate alleles in pooled samples with four or six possible alleles.

**Supplemental Figure 3. Frequency of likely deleterious mutations in 14 genes by study.**



# Supplemental Figure 1

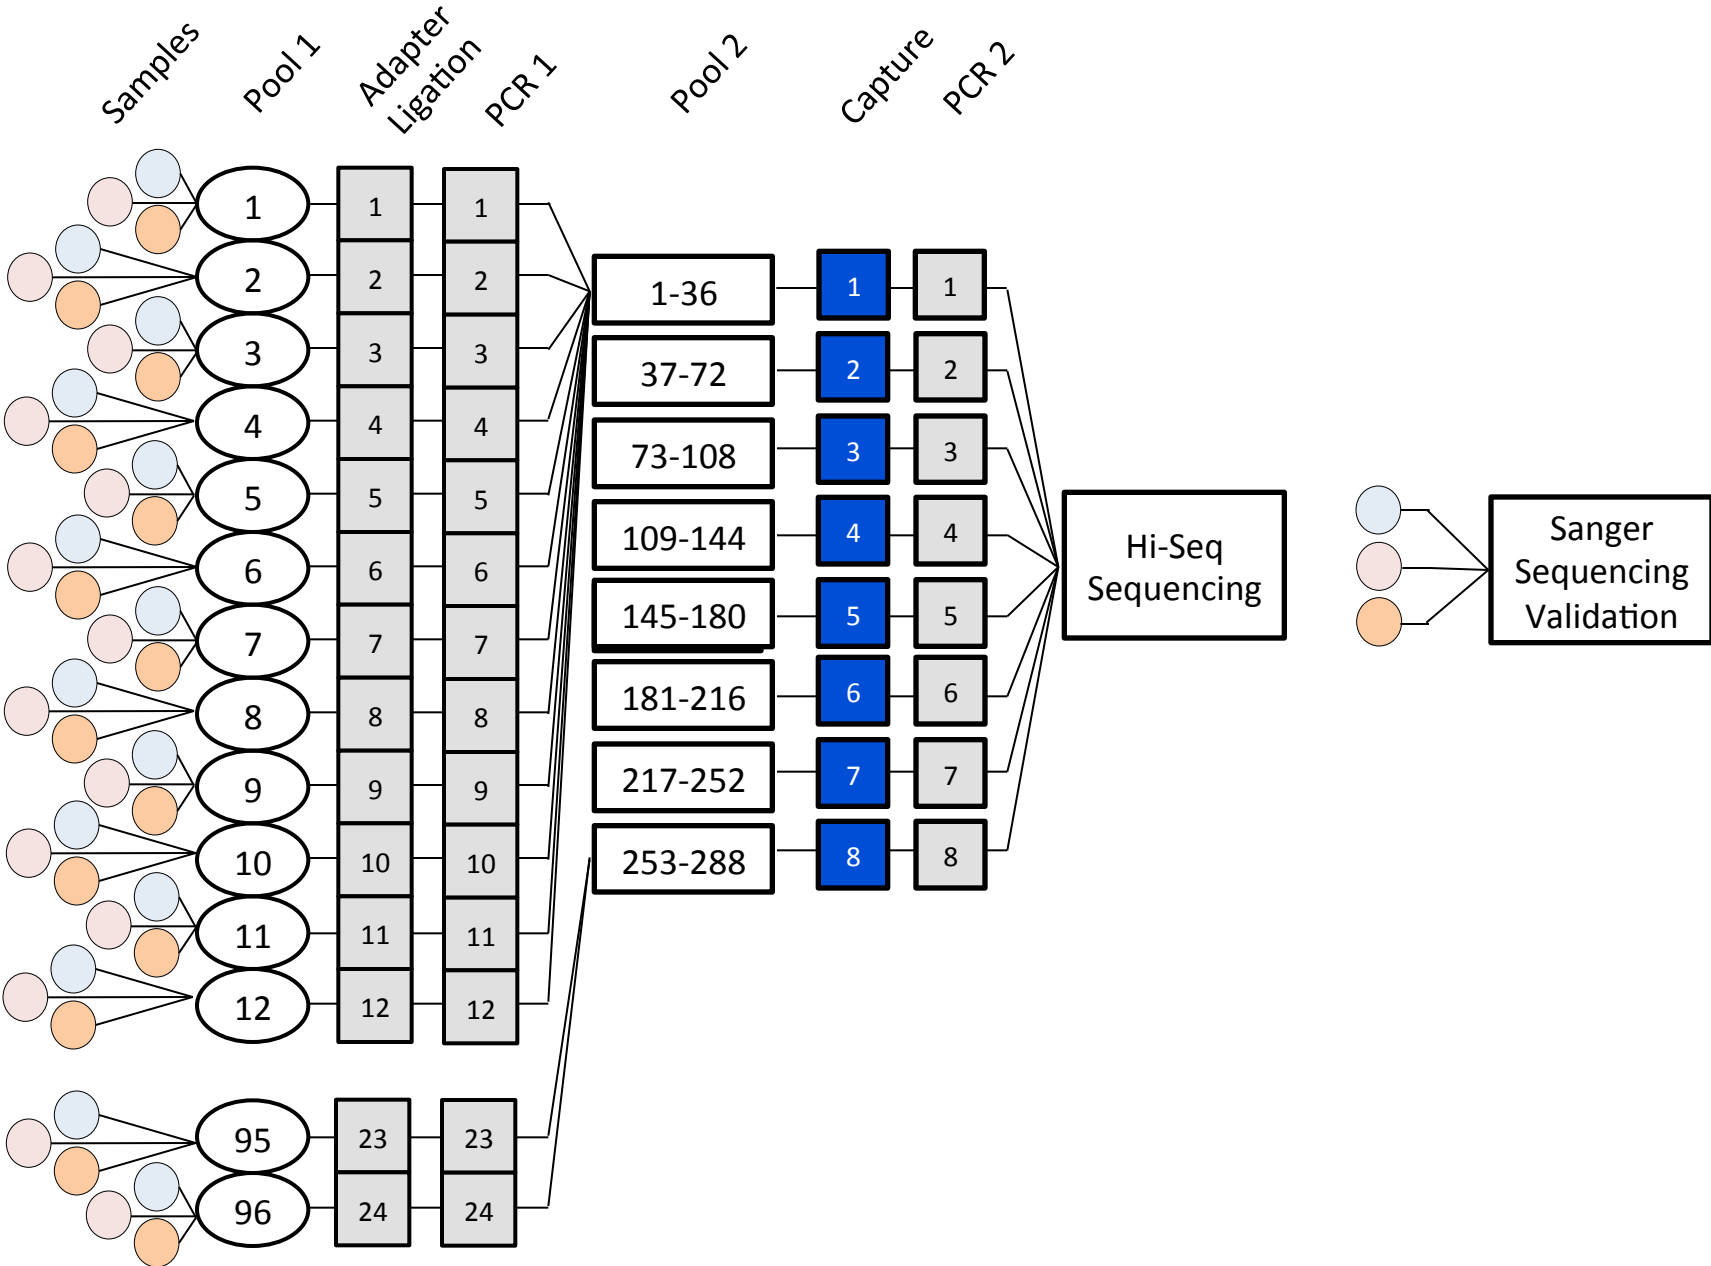

# Supplemental Figure 2

**A**

Average Exon Coverage

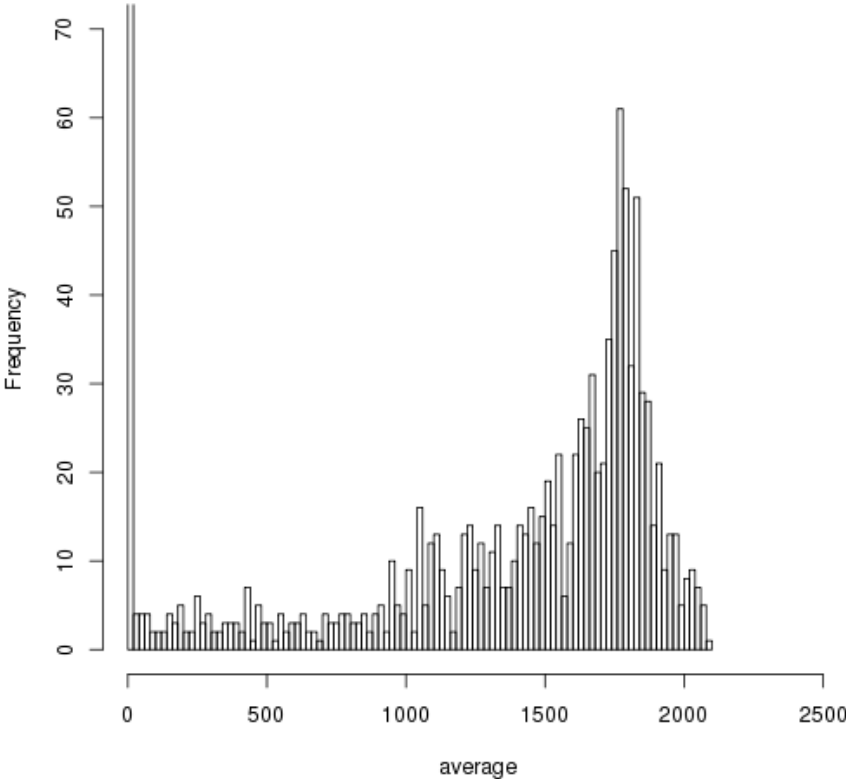

**B**

Alternate Allele Frequency

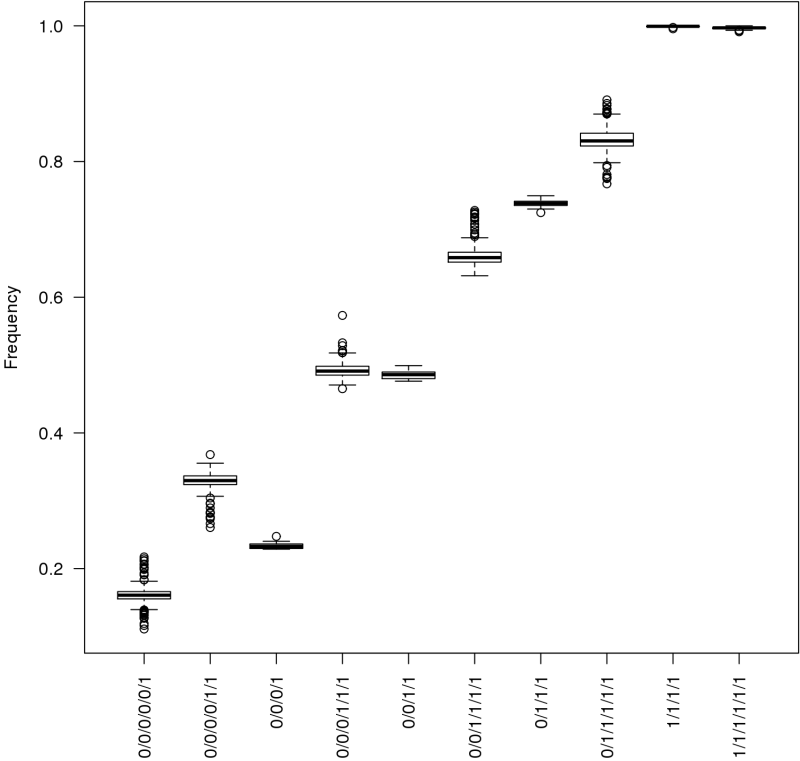

# Supplemental Figure 3

Count of Gene

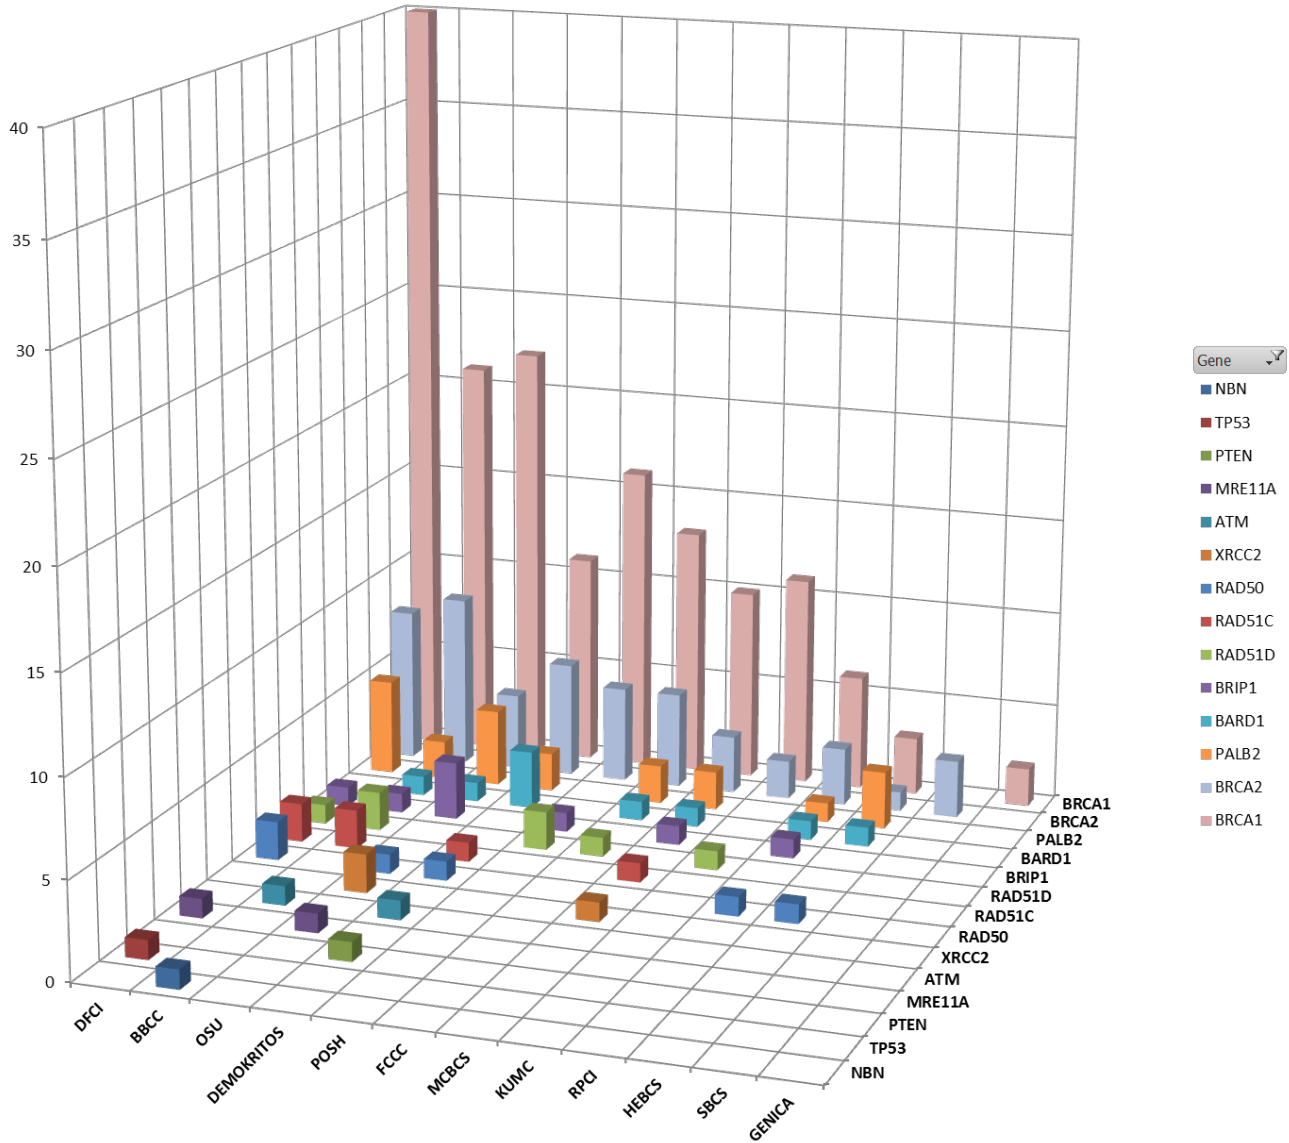

Supplement: supp_JCO.2014.57.1414_DS_JCO.2014.57.1414.pdf [file supp_JCO.2014.57.1414_DS_JCO.2014.57.1414.pdf]
